# Supplementary material for: Supermagnetic Mn-substituted ZnFe2O4 with AB-site hybridization for the ultra-effective catalytic degradation of azoxystrobin
Source: Royal Society of Chemistry journal article supplement (doi:10.1039/d2cy00142j), 2022-01-01
Supplement: d2cy00142j1.pdf [file d2cy00142j1.pdf]

## Supporting Information

### **Supermagnetic Mn-substituted ZnFe<sub>2</sub>O<sub>4</sub> in AB-sites Hybridization for Ultra-effective catalytic degradation of azoxystrobin**

Zhong-Ting Hu,<sup>a,b</sup> Zi-Yan Jin,<sup>a</sup> Si-Yan Gong,<sup>a</sup> Xiuzhen Wei,<sup>a</sup> Jia Zhao,<sup>b</sup> Mian Hu,<sup>a,\*</sup> Jun Zhao,<sup>c,\*</sup> Zhong Chen,<sup>d</sup> Zhiyan Pan,<sup>a</sup> Xiaonian Li,<sup>b</sup>

<sup>a</sup> College of Environment, Zhejiang University of Technology (ZJUT), Hangzhou 310014, China

<sup>b</sup> Industrial Catalysis Institute, ZJUT, Hangzhou 310014, China

<sup>c</sup> Institute of Bioresource and Agriculture, Hong Kong Baptist University, Hong Kong SAR

<sup>d</sup> School of Material Science and Engineering, Nanyang Technological University, Singapore 639798, Singapore

\*E-mail: [mianhu@zjut.edu.cn](mailto:mianhu@zjut.edu.cn); [zhaojun@hkbu.edu.hk](mailto:zhaojun@hkbu.edu.hk)

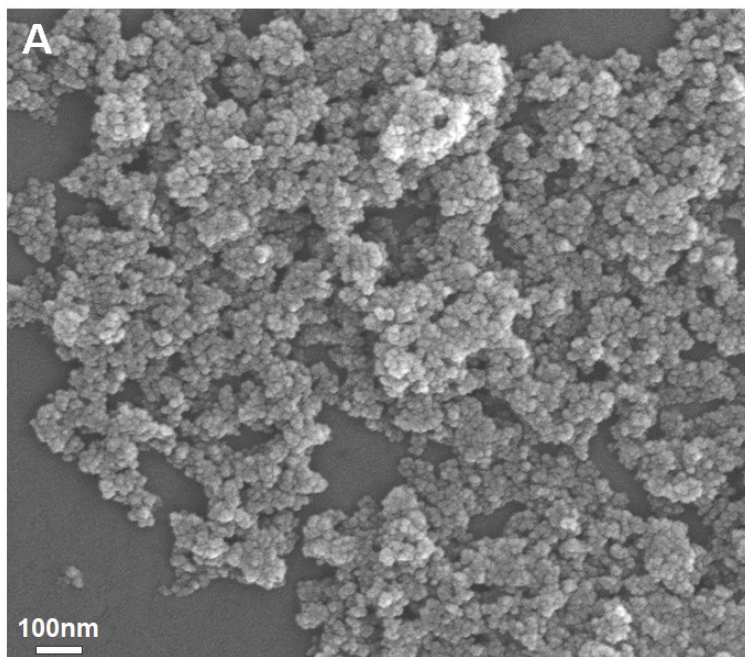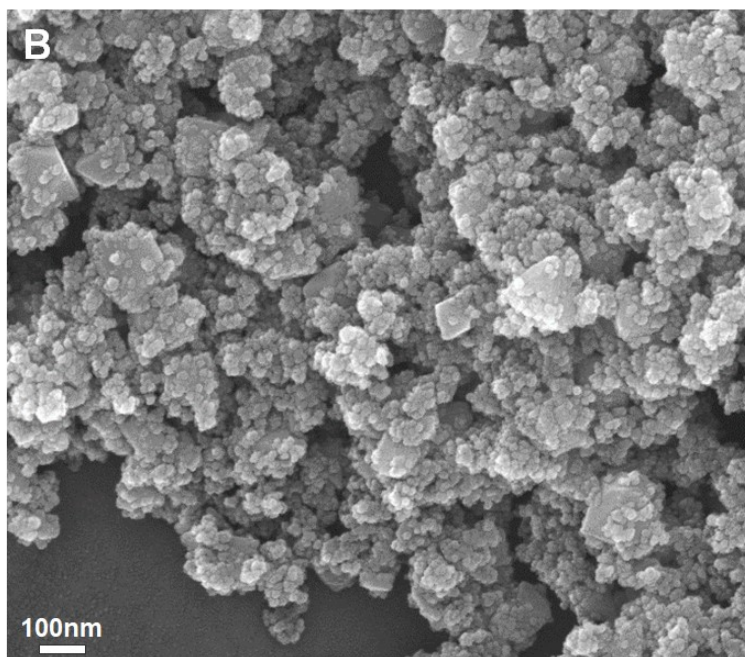

**Figure S1.** SEM images of the ZF and MF catalysts.

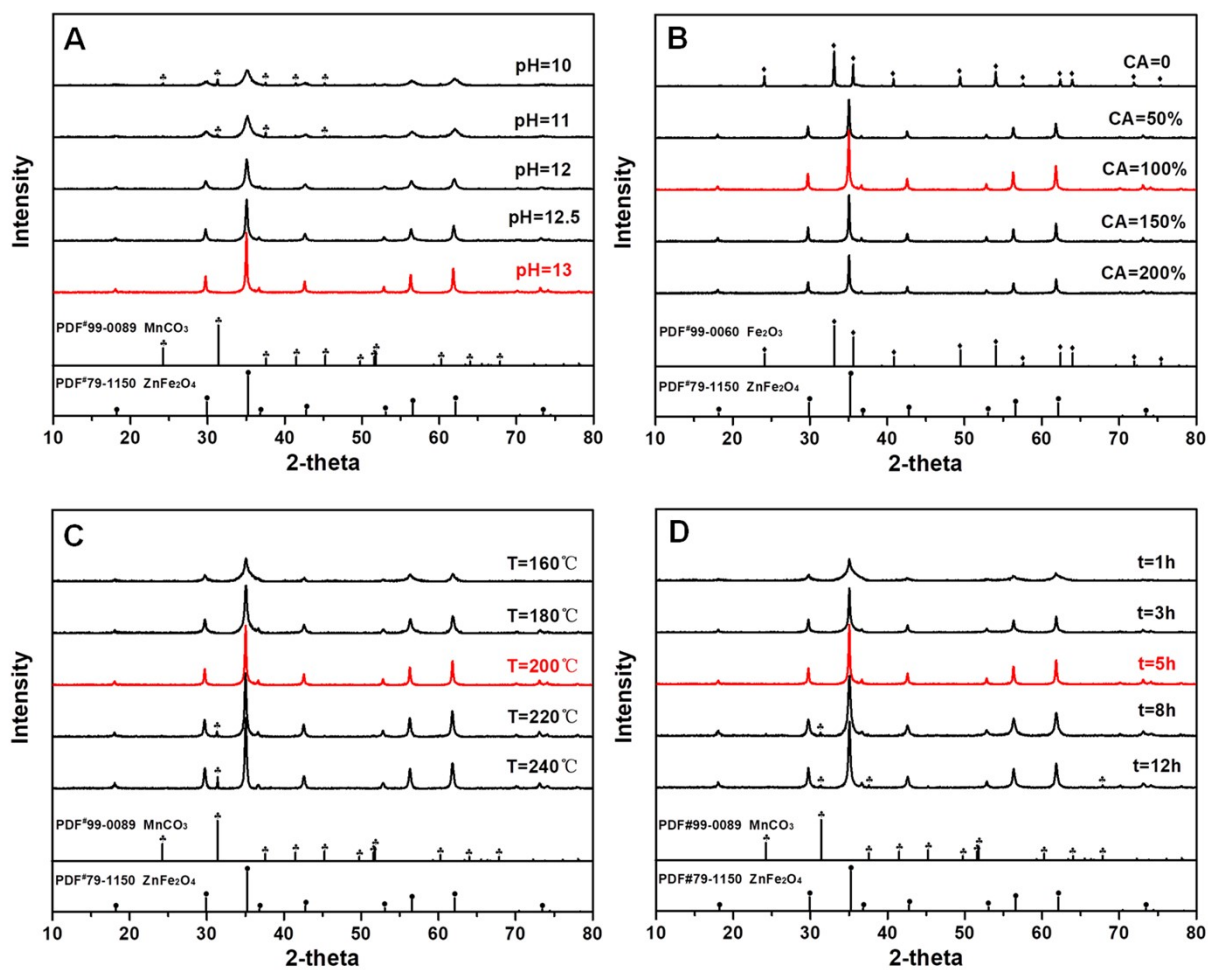

**Figure S2.** XRD patterns for the prepared Mn-substituted ZnFe<sub>2</sub>O<sub>4</sub> samples (ZMF<sub>0.75</sub>) at different pH value (A), citric acid addition (B), temperature (C) and reaction time (D) in hydrothermal reaction. Experimental conditions: (A) [CA] = 100%, T = 200 °C, t = 5 h; (B) pH = 13, T = 200 °C, t = 5 h; (C) pH = 13, [CA] = 100%, t = 5 h; (D) pH = 13, [CA] = 100%, T = 200 °C.

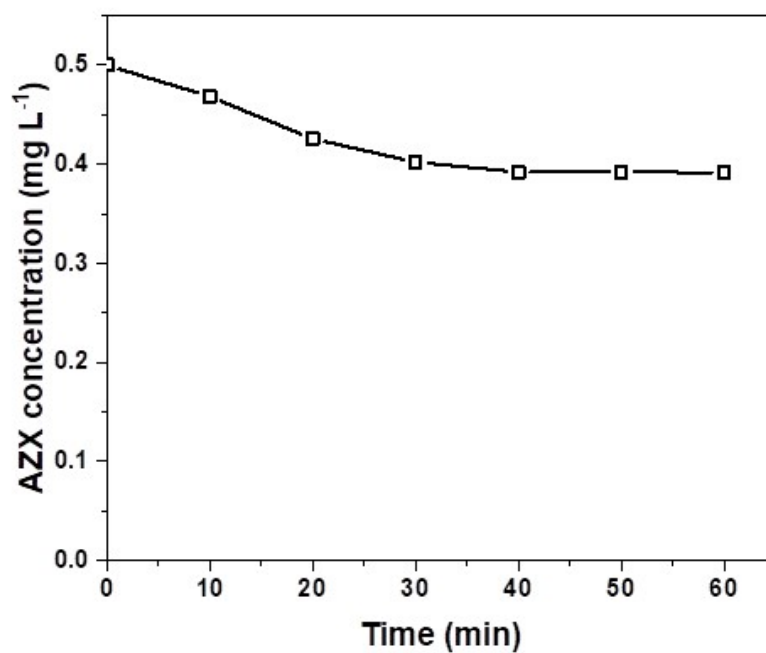

**Figure S3.** AZX removal efficiency by ZMF0.75 adsorption at the control experimental conditions of  $[AZX] = 0.5 \text{ mg L}^{-1}$ ,  $[ZMF_{0.75}] = 0.2 \text{ g L}^{-1}$ , and  $\text{pH} = 4.5 \pm 0.2$ .

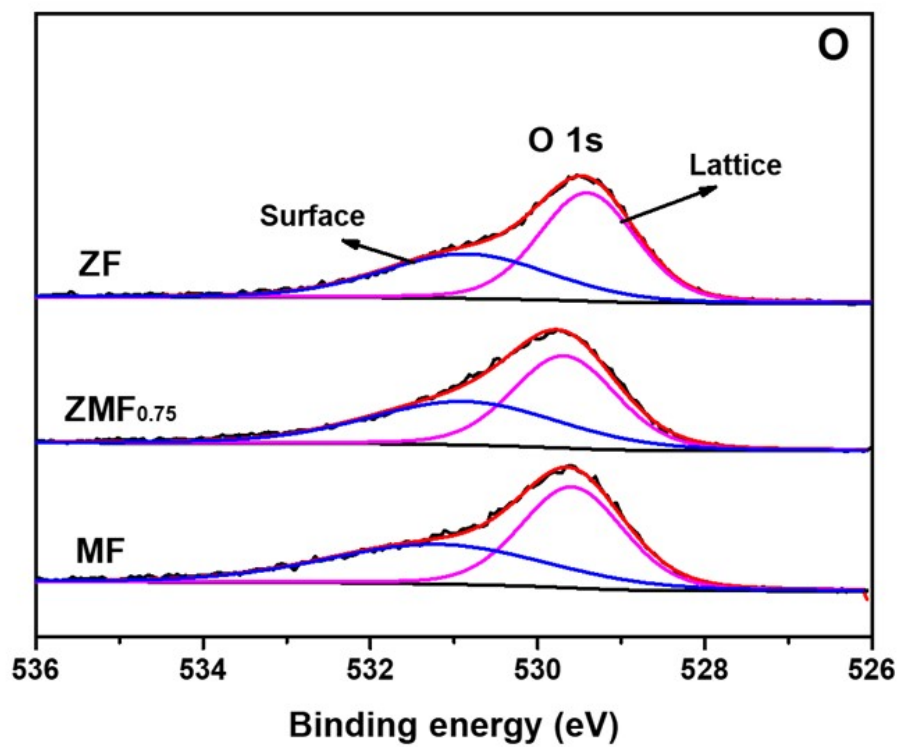

**Figure S4.** High resolution XPS spectra of O 1s for ZF, ZMF<sub>0.75</sub> and MF, respectively.

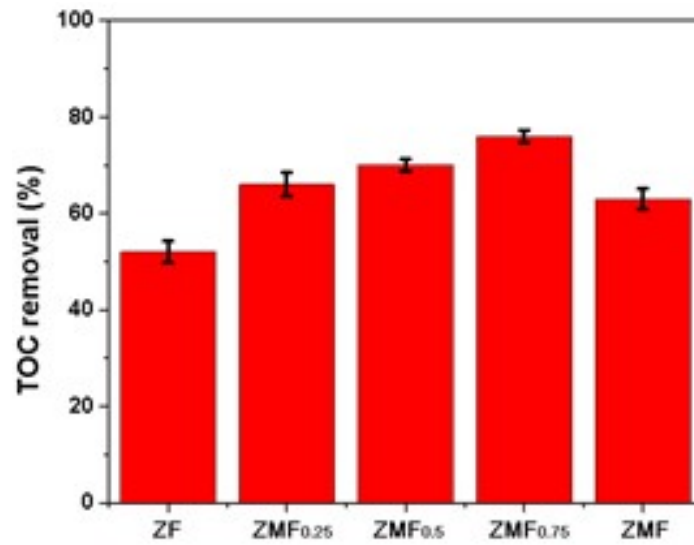

**Figure S5.** TOC removal based on the as-prepared catalysts in Fenton-like system at 10 hours. The experimental conditions are  $[AZX] = 0.5 \text{ mg L}^{-1}$ ,  $[\text{catalyst}] = 0.2 \text{ g L}^{-1}$ ,  $\text{pH} = 4.5 \pm 0.2$ ,  $[\text{H}_2\text{O}_2] = 100 \text{ mM}$ .

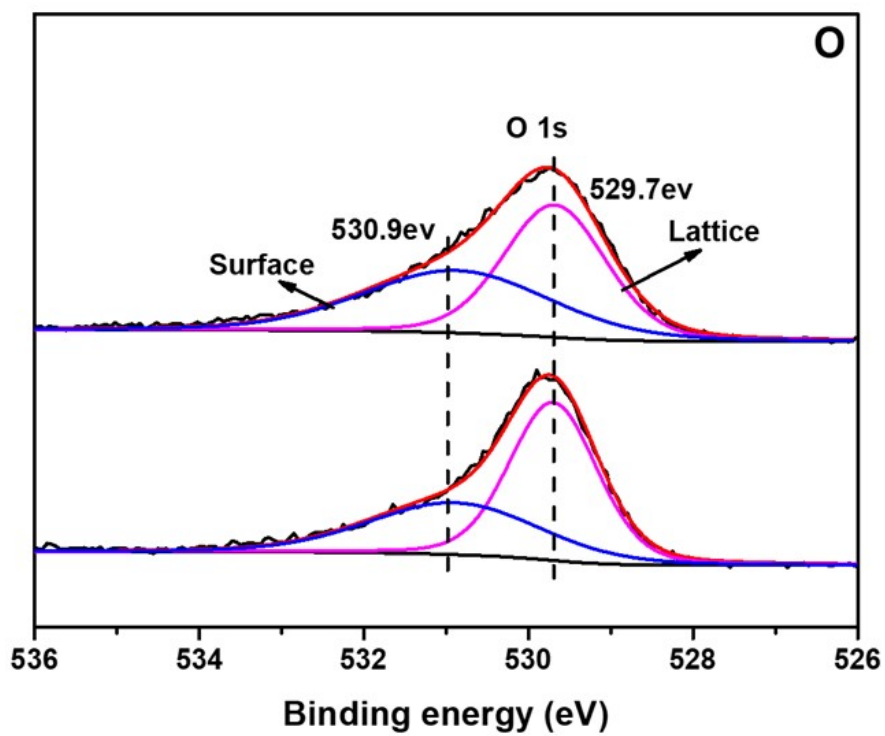

**Figure S6.** High resolution XPS spectra of O 1s for used ZMF<sub>0.75</sub> compared with its fresh.

**Table S1.** Characteristics summary of the as-prepared catalysts on crystal lattice parameters and crystal size

| Catalyst            | Crystal structure |       |       |                     | <sup>a</sup> Crystallite size (nm) |
|---------------------|-------------------|-------|-------|---------------------|------------------------------------|
|                     | a [Å]             | a [Å] | a [Å] | V [Å <sup>3</sup> ] |                                    |
| ZF                  | 8.441             | 8.441 | 8.441 | 602.26              | 9.4                                |
| ZMF <sub>0.25</sub> | 8.449             | 8.449 | 8.449 | 603.46              | 13.9                               |
| ZMF <sub>0.5</sub>  | 8.467             | 8.467 | 8.467 | 606.94              | 21.2                               |
| ZMF <sub>0.75</sub> | 8.483             | 8.483 | 8.483 | 610.22              | 20.9                               |
| MF                  | 8.505             | 8.505 | 8.505 | 614.14              | 19.8                               |

<sup>a</sup> Calculation by the Scherrer equation based on the facet (311).



Table S2. A brief of Fenton-like system driven by varied spinel ferrites for organic pollutants degradation

| Catalyst                                             | Synthesis method                | Morphology/nanostructure                      | System conditions                                                                                                                                  | Degradation rate | Radical species                                                                     | Ref.        |
|------------------------------------------------------|---------------------------------|-----------------------------------------------|----------------------------------------------------------------------------------------------------------------------------------------------------|------------------|-------------------------------------------------------------------------------------|-------------|
| ZMF <sub>0.75</sub>                                  | Hydrothermal way                | Nanocluster with nanoparticle size of 5~10 nm | [AZX] = 0.5 mg L <sup>-1</sup> ,<br>[catalyst] = 0.2 g L <sup>-1</sup> ,<br>[H <sub>2</sub> O <sub>2</sub> ] = 100 mM,<br>pH = 4.5 ± 0.2           | 99% in 300 min   | HO <sup>•</sup> ,<br>HO <sub>2</sub> <sup>•</sup>                                   | This report |
| Fe <sub>3</sub> O <sub>4</sub>                       | Chemical coprecipitation method | Quasi-spherical particles                     | [4-chlorocatechol] = 1 mmol L <sup>-1</sup> ,<br>[catalyst] = 1 g L <sup>-1</sup> ,<br>[H <sub>2</sub> O <sub>2</sub> ] = 50 mM,<br>pH = 6.5 ± 0.2 | ~99% in 180 min  | HO <sup>•</sup> ,<br>HO <sub>2</sub> <sup>•</sup> ,<br>O <sub>2</sub> <sup>-•</sup> | 1           |
| MnFe <sub>2</sub> O <sub>4</sub>                     | Sol-gel method                  | Near-nubby morphology                         | [norfloxacin] = 10 mg L <sup>-1</sup> ,<br>[catalyst] = 0.6 g L <sup>-1</sup> ,<br>[H <sub>2</sub> O <sub>2</sub> ] = 200 mM,<br>pH = 6.6          | 90.6% in 180 min | HO <sup>•</sup>                                                                     | 2           |
| Mn <sub>1.07</sub> Fe <sub>1.93</sub> O <sub>4</sub> | Solvothermal way                | Sphere-like morphology                        | [methylene blue] = 400 mg L <sup>-1</sup> ,<br>[catalyst] = 0.5 g L <sup>-1</sup> ,<br>[H <sub>2</sub> O <sub>2</sub> ] = 1323 mM,<br>pH at acidic | 98.2% in 360 min | HO <sup>•</sup> ,<br>HO <sub>2</sub> <sup>•</sup>                                   | 3           |

References:

- [1] J. He, X. Yang, B. Men, Z. Bi, Y. Pu, D. Wang, Heterogeneous Fenton oxidation of catechol and 4-chlorocatechol catalyzed by nano-Fe<sub>3</sub>O<sub>4</sub>: Role of the interface, *Chemical Engineering Journal*, 2014, 258, 433-441.
- [2] G.Wang, D. Zhao, F. Kou, Q. Ouyang, J. Chen, Z. Fang, Removal of norfloxacin by surface Fenton system (MnFe<sub>2</sub>O<sub>4</sub>/H<sub>2</sub>O<sub>2</sub>): Kinetics, mechanism and degradation pathway, *Chemical Engineering Journal*, 2018, 351, 747-755.
- [3] M., Li, Q. Gao, T. Wang, Y.S., Gong, B. Han, K.S., Xia, C.G., Zhou, Solvothermal synthesis of Mn<sub>x</sub>Fe<sub>3-x</sub>O<sub>4</sub> nanoparticles with interesting physicochemical characteristics and good catalytic degradation activity, *Materials & Design*, 2016, 97, 341-348.
